# Supplementary material
Source: publisher figshare collection journal article supplement (https://acs.figshare.com/ndownloader/files/4610749)

## Supporting Information of

# Insertion of Alkynes into an ArS-Pt Bond: Regio- and Stereoselective Thermal Reactions, Facilitation by “*o*-Halogen Effect” and Photo-irradiation, Different Alkyne Preferences Depending on the Ancillary Ligand, and Application to a Catalytic Reaction

Hitoshi Kuniyasu,\* Kazunobu Takekawa, Fumikazu Yamashita, Kiyoshi Miyafuji, Shigehito Asano, Yasutomo Takai, Atsushi Ohtaka, Aoi Tanaka, Kunihiko Sugoh, Hideo Kurosawa and Nobuaki Kambe\*

*Department of Applied Chemistry, Graduate School of Engineering, Osaka University, Suita, Osaka 565-0871, Japan*

### UV-vis spectrum of *trans*-8a.

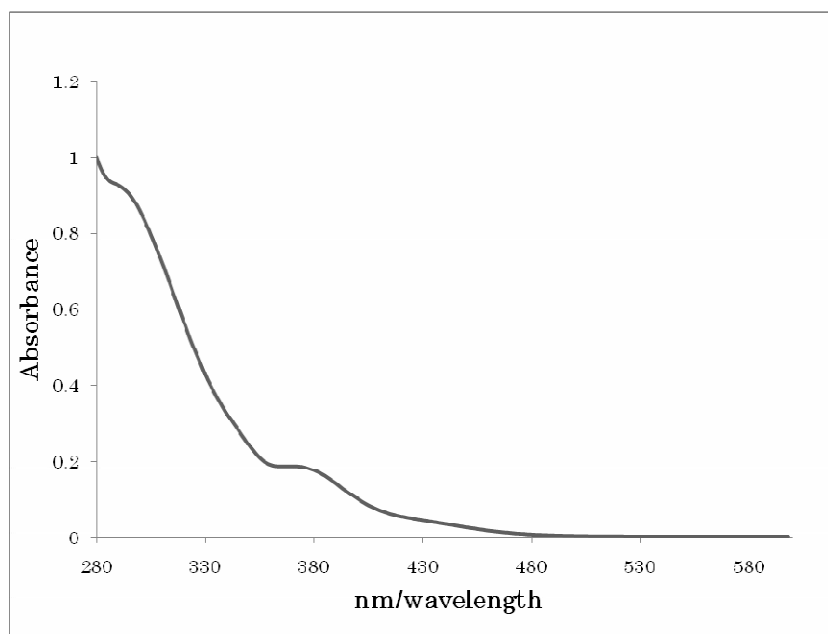

**UV-vis spectrum of *cis*-Z-16c.**

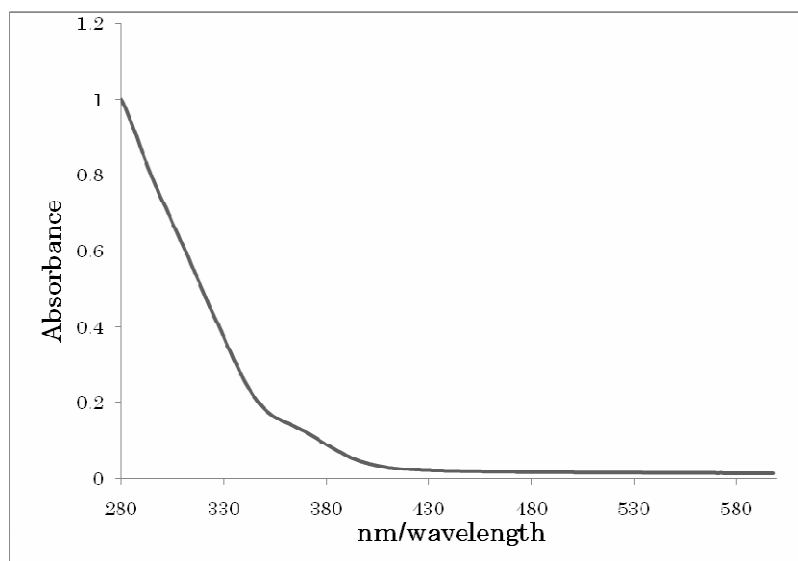

Supplement: Supplementary file 1 [file 4610749]
